# Supplementary material for: Monitoring Endothelial and Tissue Responses to Cobalt Ferrite Nanoparticles and Hybrid Hydrogels
Source: PubMed Central journal article supplement (PMC5201301; doi:10.1371/journal.pone.0168727), 2016-12-30

## Supporting information S1

### Original blots of Figs 1, 2, 3, 4

Figure 1C: Expression of caspase-3 in HUVEC exposed to NPs (0.25 mg/ml). Cells were exposed to the biomaterials for 24 h and then lysed. (1: Ctr; 2:  $\text{CoFe}_2\text{O}_4$ ; 3:  $\text{CoFe}_2\text{O}_4\text{-NH}_2$ )

Representative blot of the first version of the paper:

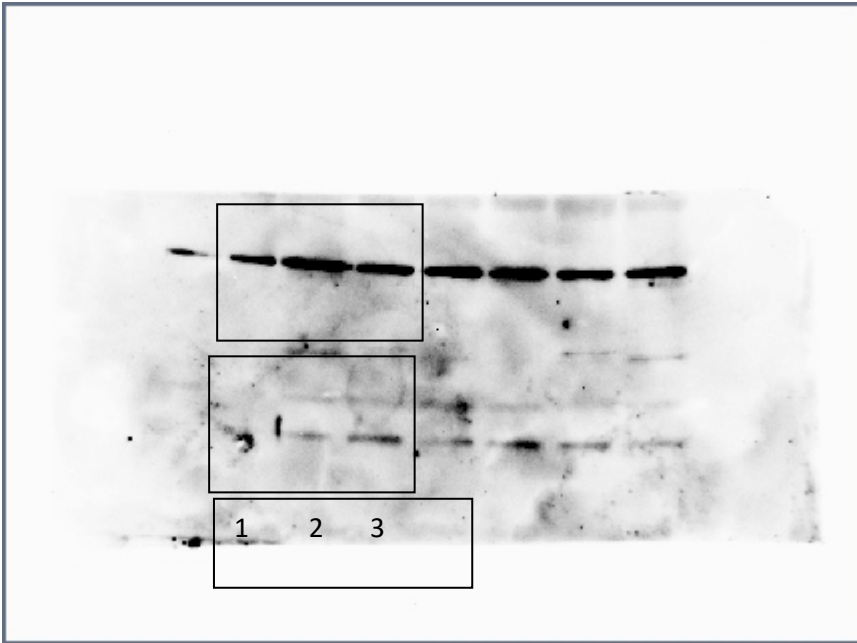

Blank:

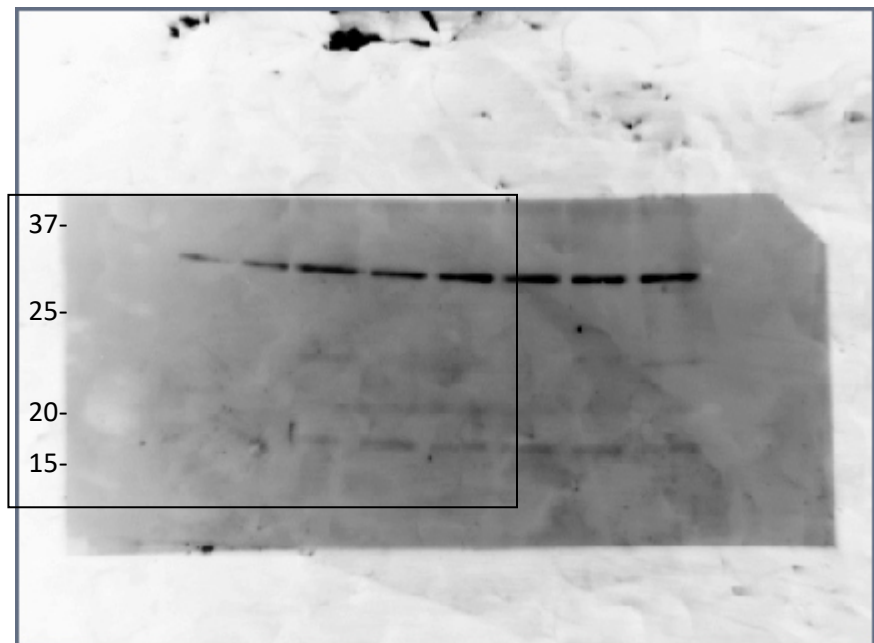

Second representative image:

Cleaved caspase -3

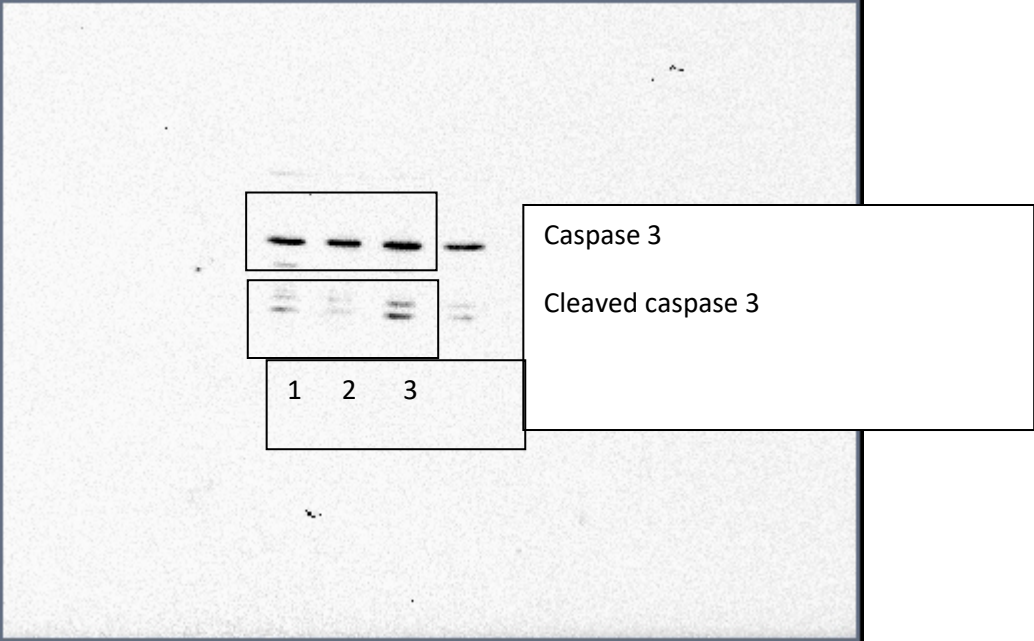

Blank

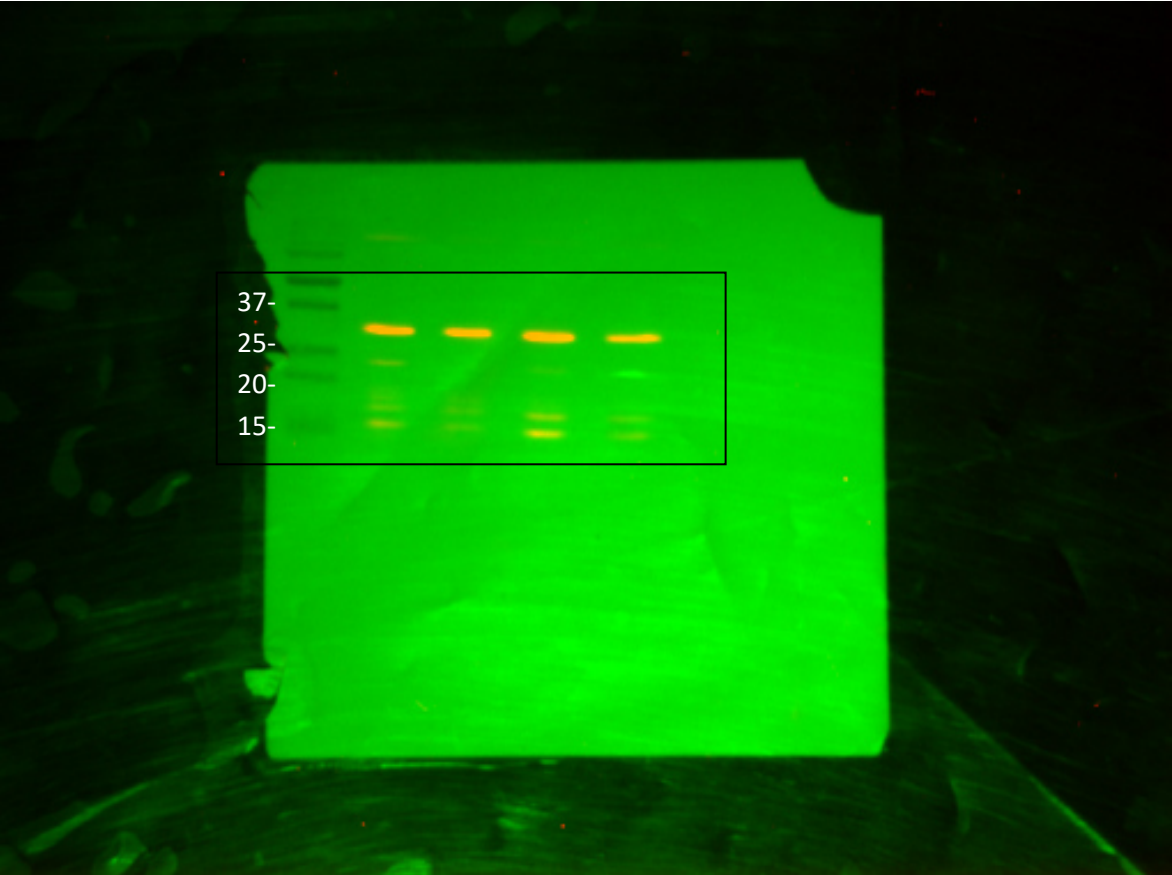

Figure 1E: Expression of p21 in HUVEC exposed to NPs (0.25 mg/ml). Cells were exposed to the biomaterials for 24 h and then lysed. (1: Ctr; 2: CoFe<sub>2</sub>O<sub>4</sub>; 3: CoFe<sub>2</sub>O<sub>4</sub>-NH<sub>2</sub>)

P21

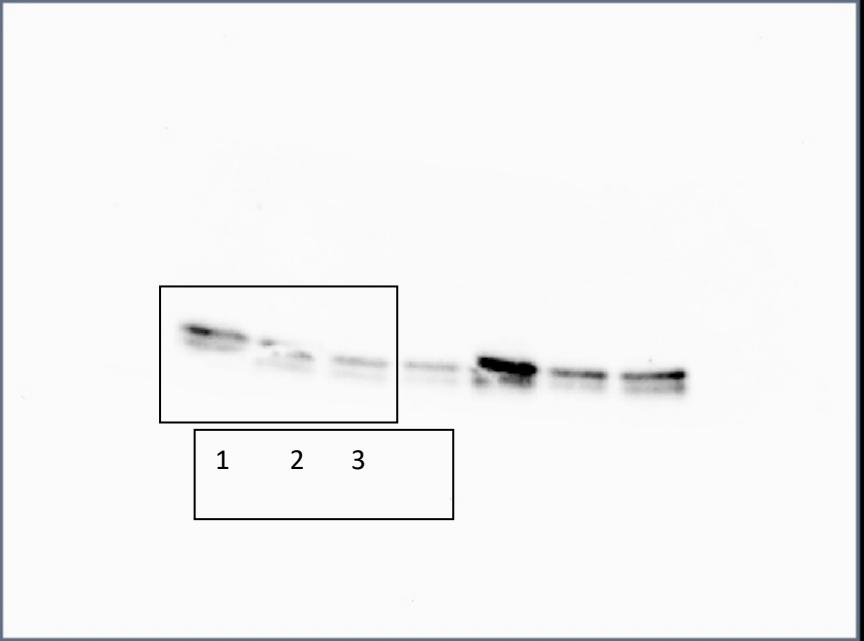

β-Actin:

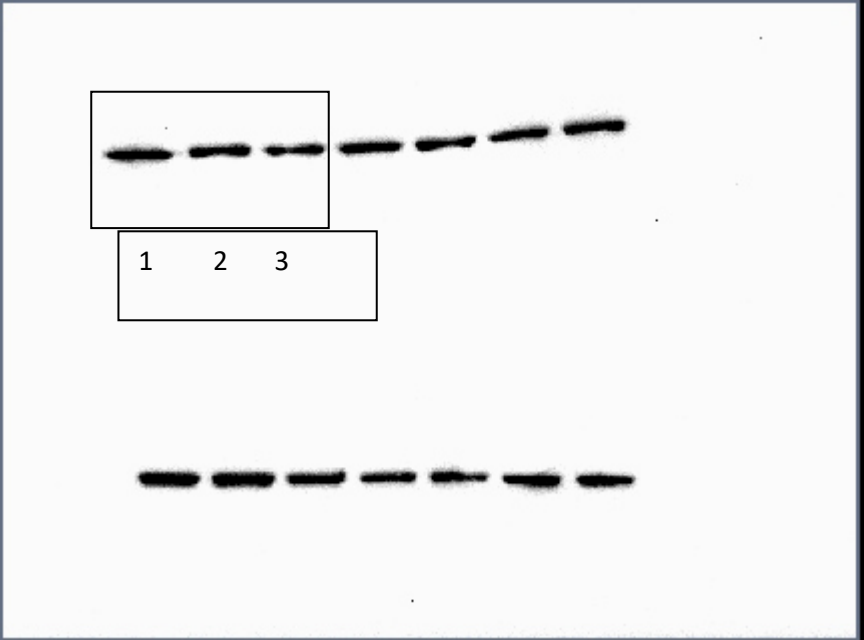

Figure 1F: Expression of p53 in HUVEC exposed to NPs (0.25 mg/ml) . Cells were exposed to the biomaterials for 24 h and then lysed. (1: Ctr; 2: CoFe<sub>2</sub>O<sub>4</sub>; 3. CoFe<sub>2</sub>O<sub>4</sub>-NH<sub>2</sub>)

P53

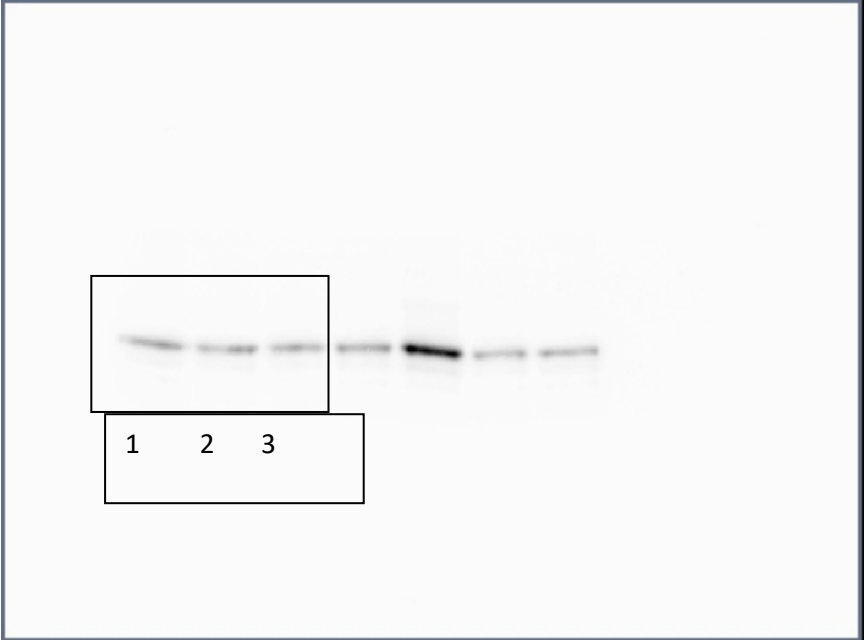

$\beta$ -Actin:

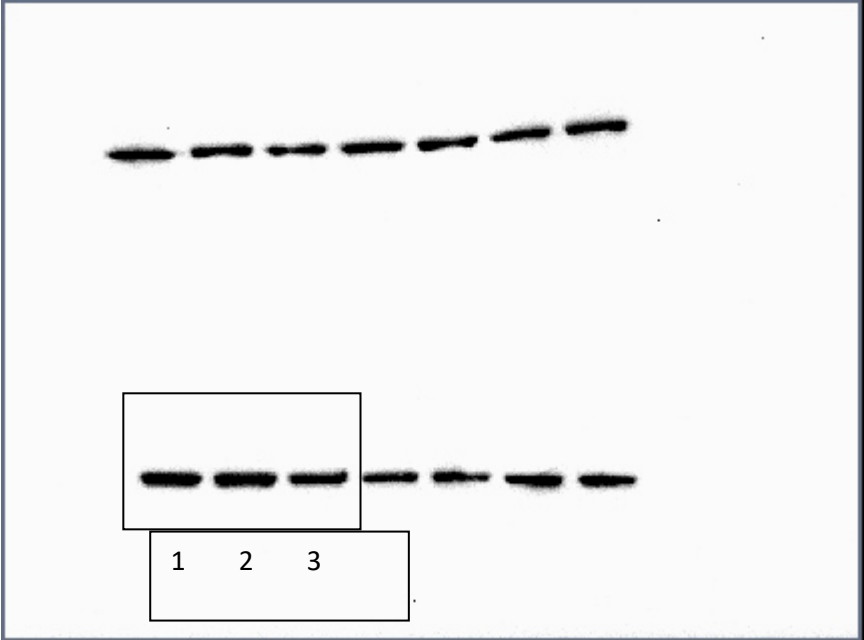

Fig 2D: Expression of COX-2 and iNOS in HUVEC exposed for 24 h to CoFe<sub>2</sub>O<sub>4</sub> NPs or CoFe<sub>2</sub>O<sub>4</sub>-NH<sub>2</sub> NPs (0.25 mg/ml) measured by western blot. Blots are representative of 3 experiments with overlapping results. (1: Ctr; 2: CoFe<sub>2</sub>O<sub>4</sub>; 3. CoFe<sub>2</sub>O<sub>4</sub>-NH<sub>2</sub>)

COX-2:

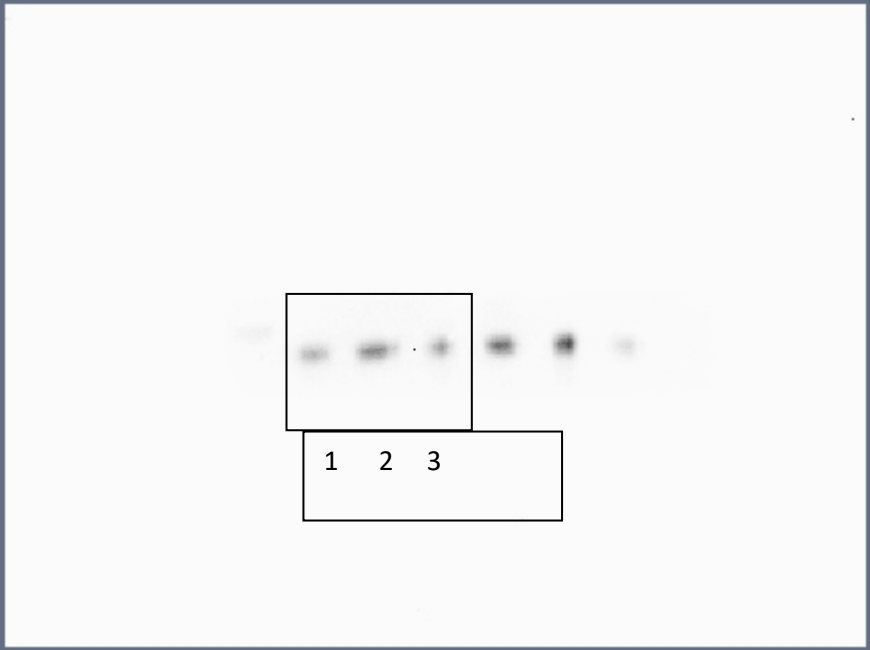

iNOS:

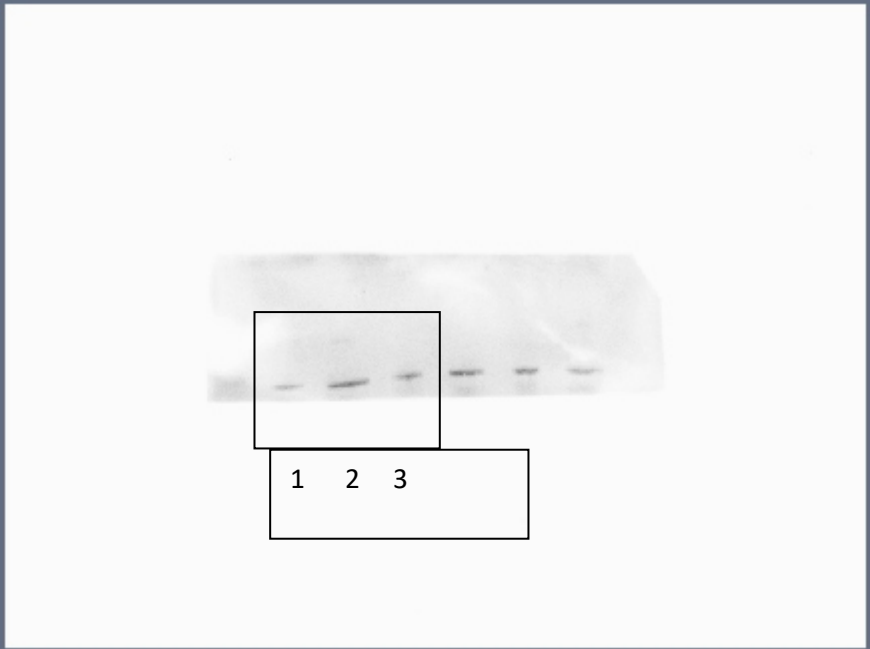

$\beta$ -Actin:

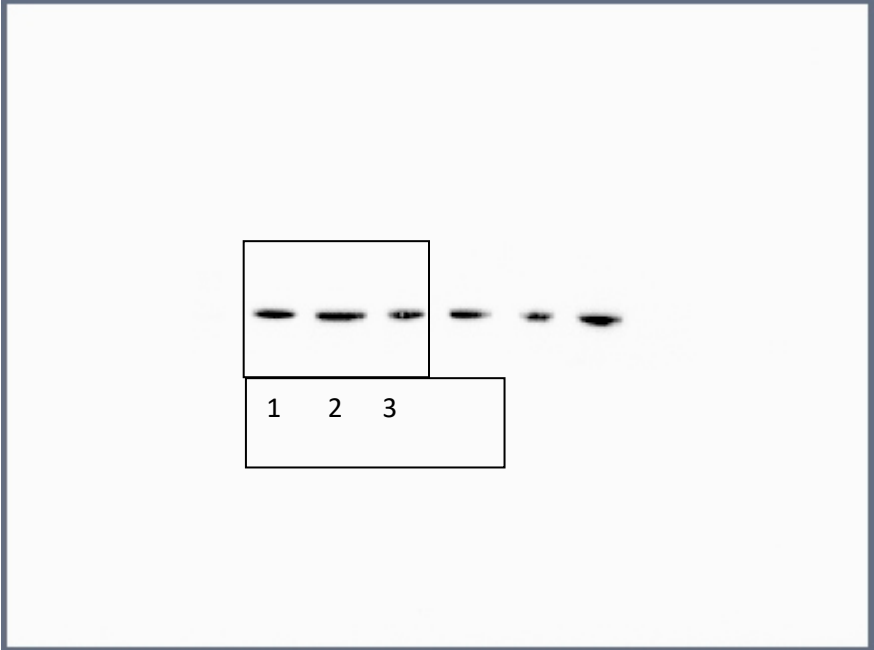

Fig 3C: Evaluation by western blot of the expression of cleaved caspase-3 in HUVEC exposed to CMC (1), CoFe<sub>2</sub>O<sub>4</sub>-CMC (2) or CoFe<sub>2</sub>O<sub>4</sub>-NH<sub>2</sub>-CMC (3) (0.5 mg/ml) for 24 h.

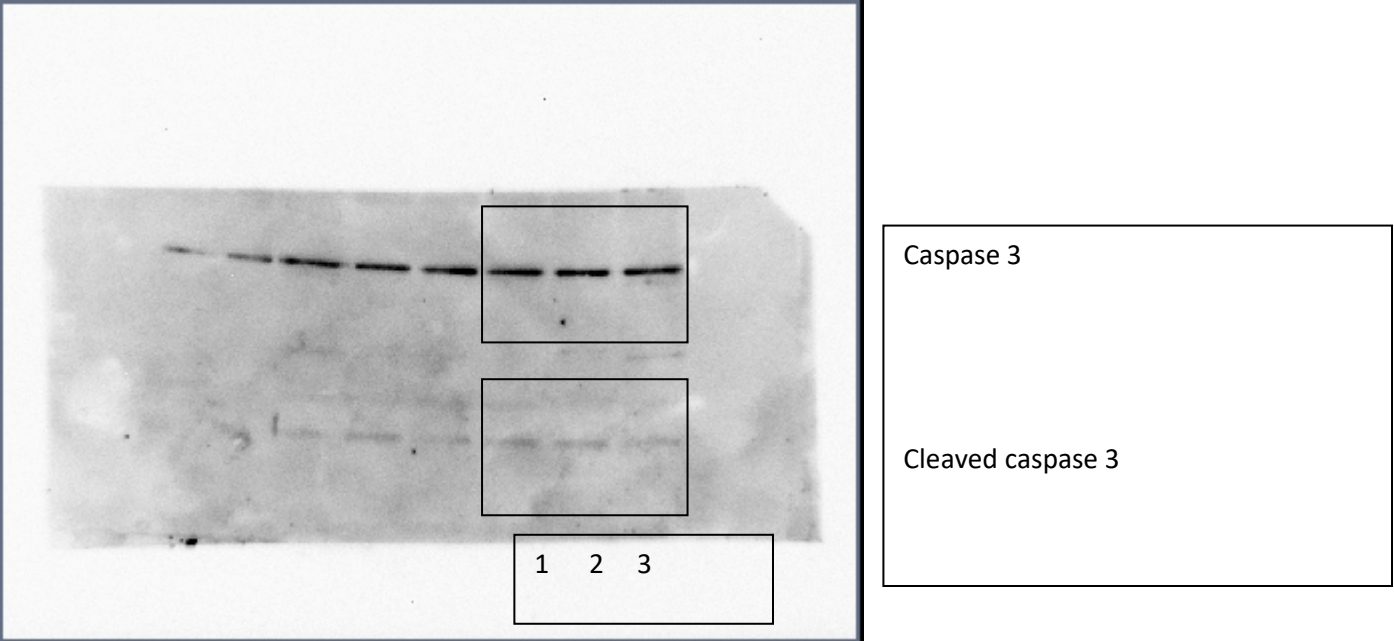

Fig 3E: Evaluation by western blot of the expression of p53 in HUVEC exposed to CMC (1), CoFe<sub>2</sub>O<sub>4</sub>-CMC (2) or CoFe<sub>2</sub>O<sub>4</sub>-NH<sub>2</sub>-CMC (3) (0.5 mg/ml) for 24 h.

P53:

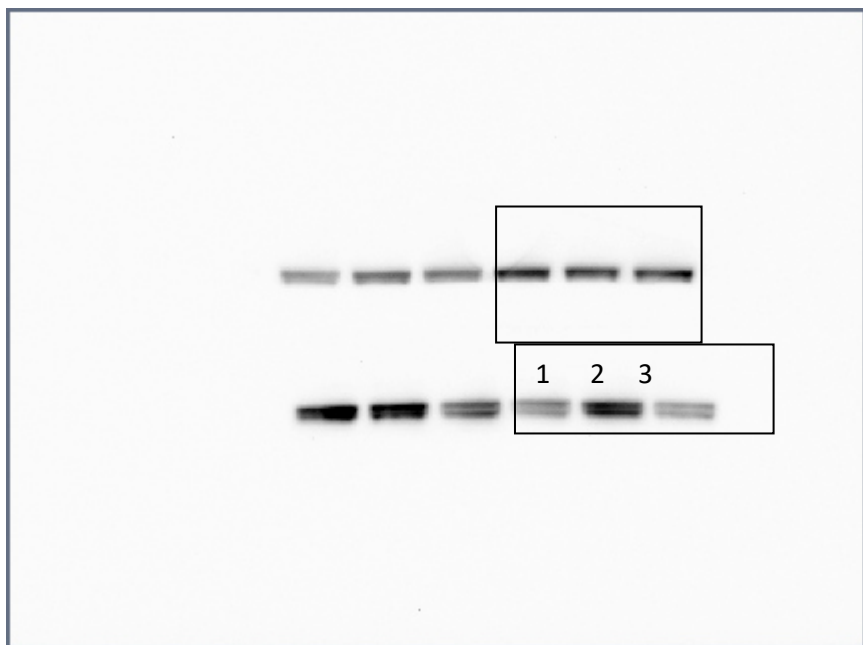

P53 bianco:

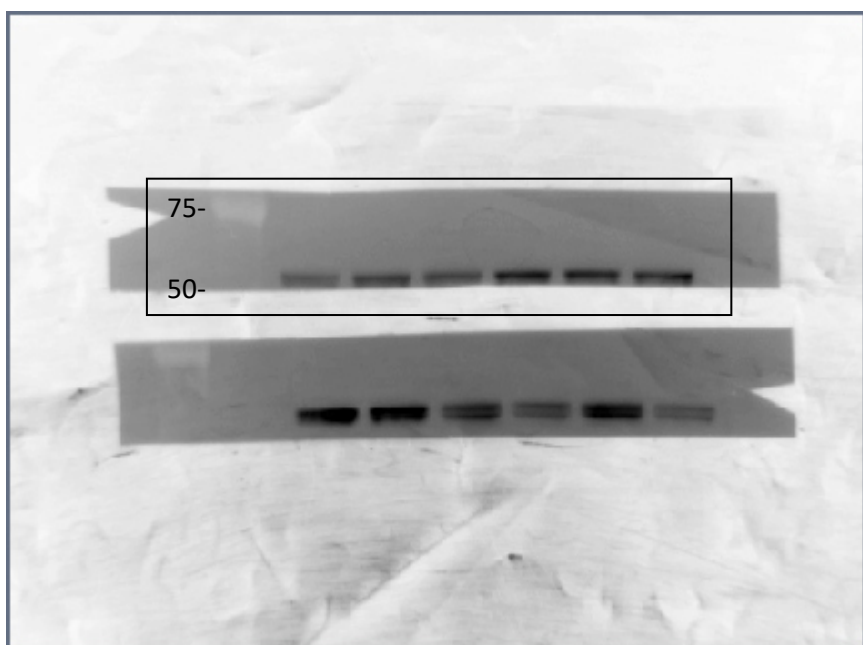



$\beta$ -Actin:

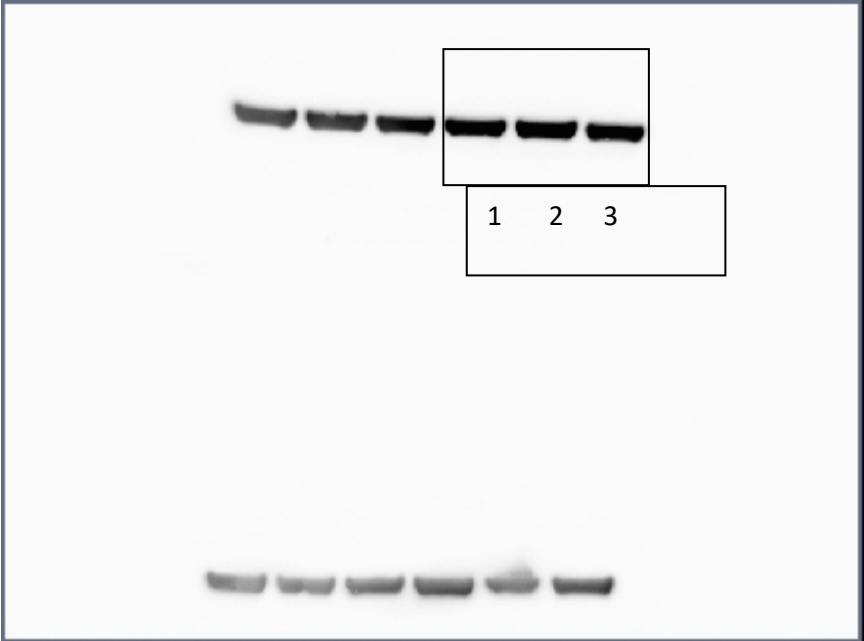

Fig 3F: Evaluation by western blot of the expression of p21 in HUVEC exposed to CMC (1), CoFe<sub>2</sub>O<sub>4</sub>-CMC (2) or CoFe<sub>2</sub>O<sub>4</sub>-NH<sub>2</sub>-CMC (3) (0.5 mg/ml) for 24 h.

P21:

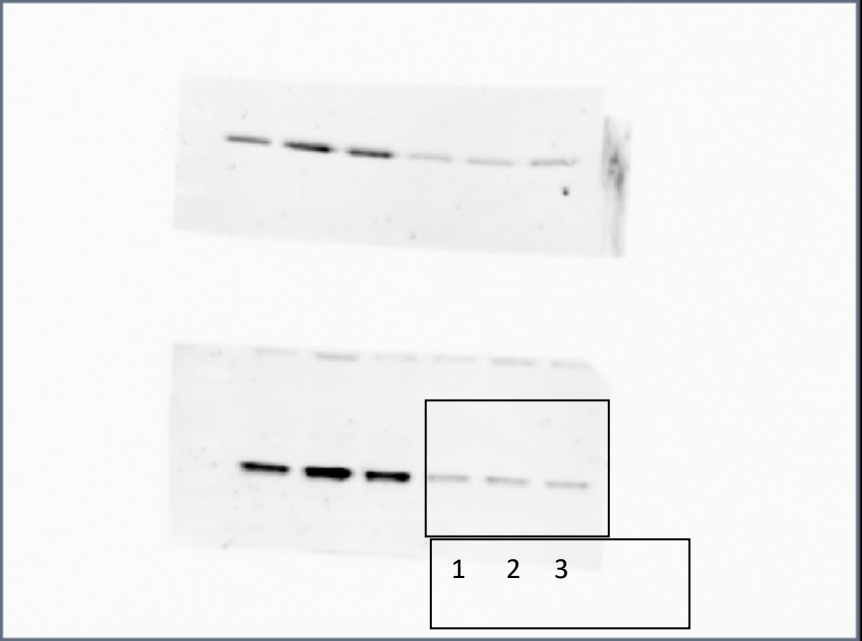

P21 bianco:

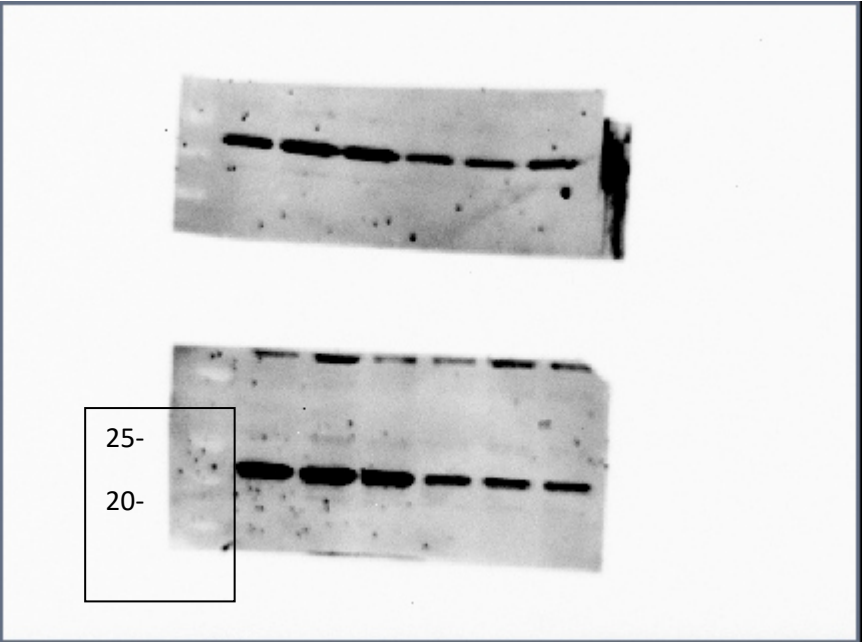

$\beta$ -Actin:

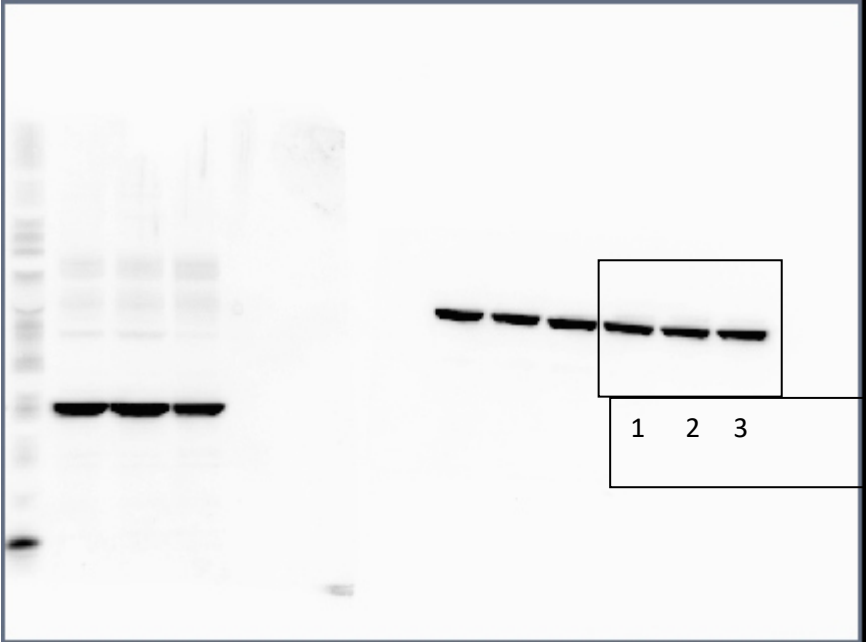

Fig 4B: Expression of COX-2 and iNOS in HUVEC exposed for 24 h to the biomaterials measured by western blot. (1. CMC, 2. CoFe<sub>2</sub>O<sub>4</sub>-CMC, 3. CoFe<sub>2</sub>O<sub>4</sub>-NH<sub>2</sub>-CMC, 4. Ctr)

COX-2

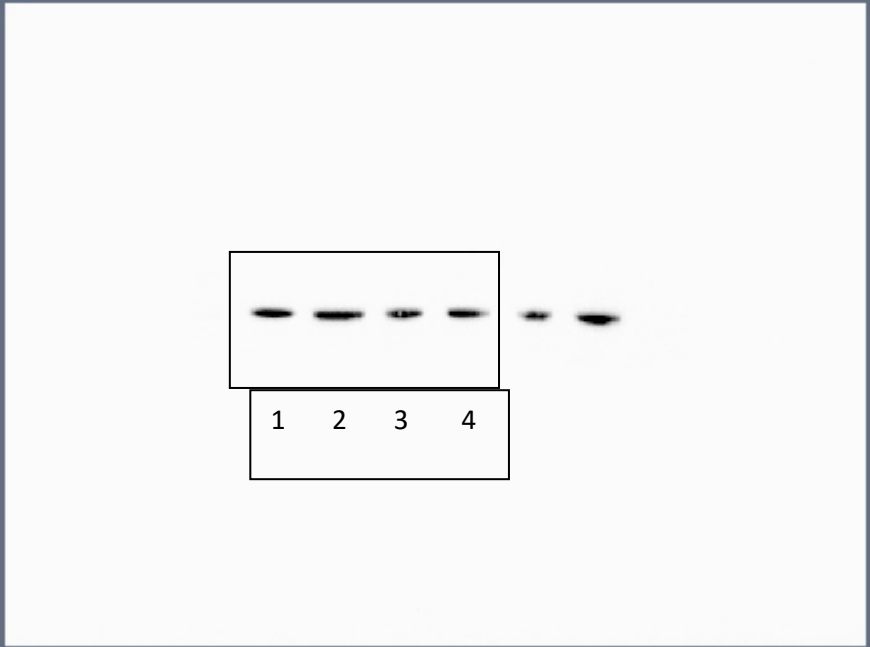

iNOS

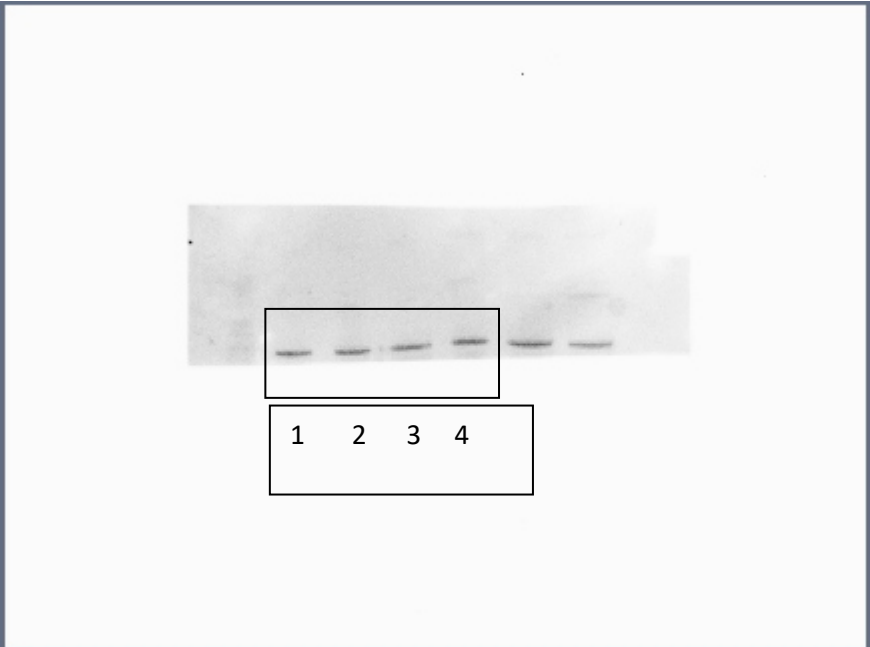

$\beta$ -Actin:

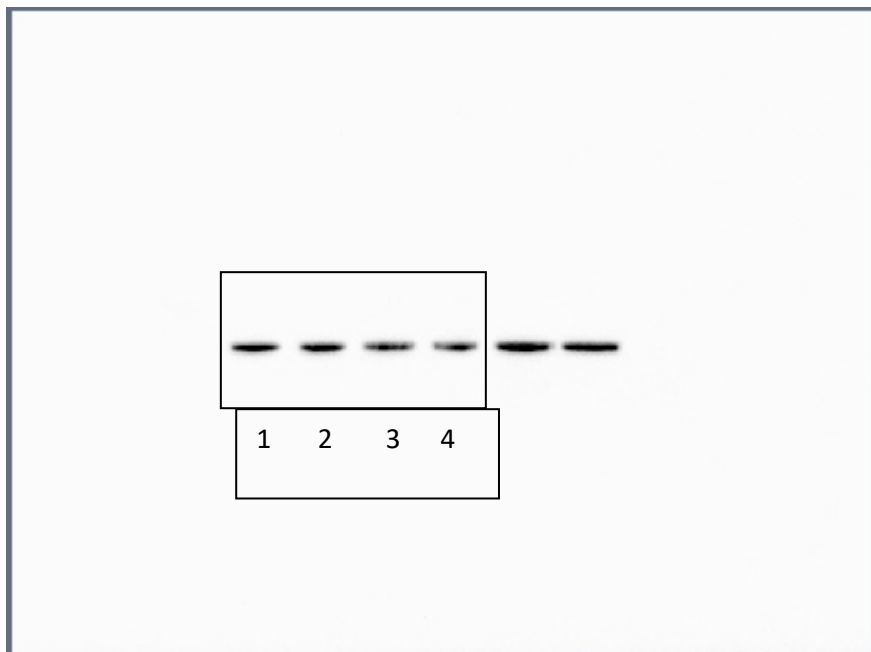

Supplement: pone.0168727.s001.pdf [file pone.0168727.s001.pdf]
